# Supplementary material for: Lipogems Product Treatment Increases the Proliferation Rate of Human Tendon Stem Cells without Affecting Their Stemness and Differentiation Capability
Source: Hindawi journal article supplement (doi:10.1155/2016/4373410), 2016-01-01

## **Supplementary Material**

Supplementary Material provided online contains the amplification efficiency of the reference gene S14 (Suppl. Figure 1), and the adipogenic, osteogenic and myogenic marker expression data measured by Real-Time PCR at 96 h of treatment with the Lipogems<sup>®</sup> product (Suppl. Figure 2).

**Supplementary Figure 1:** Amplification efficiency of the reference gene S14 measured by Real-Time PCR.

A typical result is shown.

**Supplementary Figure 1:** Effects of the Lipogems<sup>®</sup> product on adipogenic, osteogenic and myogenic differentiation promotion. (A) Adipogenic (PPAR- $\gamma$  and LPL), osteogenic (ALP), and (B) myogenic (MYOD, MYOG) marker expression by Real-Time PCR at 96 h of treatment with the Lipogems<sup>®</sup> product.

Values are expressed as fold-changes relative to control cells. Data are expressed as the means  $\pm$  SD of three different experiments. p-values were calculated using T student test. Only p-values  $<0.05$  are indicated. N/E = not expressed.

Supplementary Figure 1

Amplification efficiency of human ribosomal protein S14 in Real-Time PCR

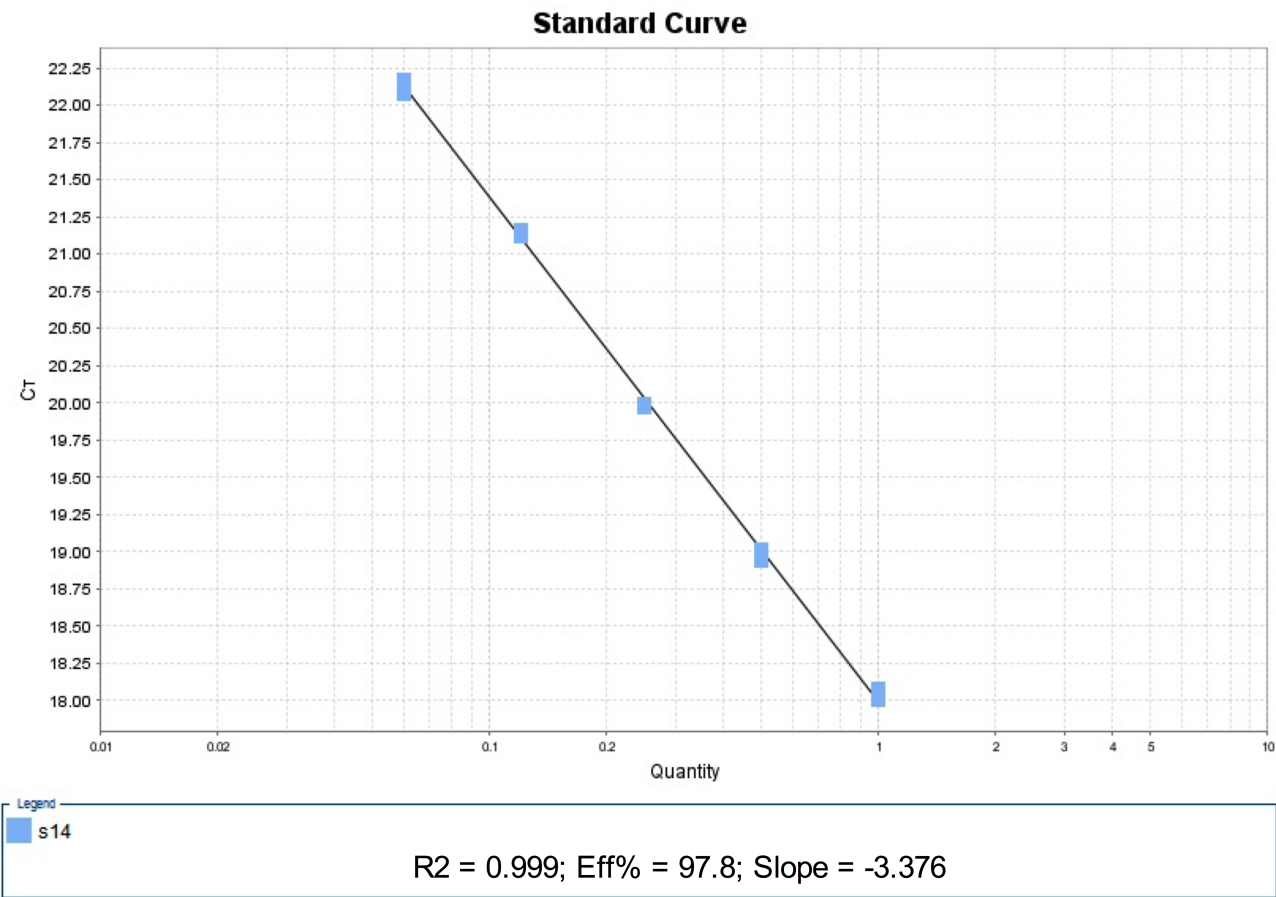

Supplementary Figure 2

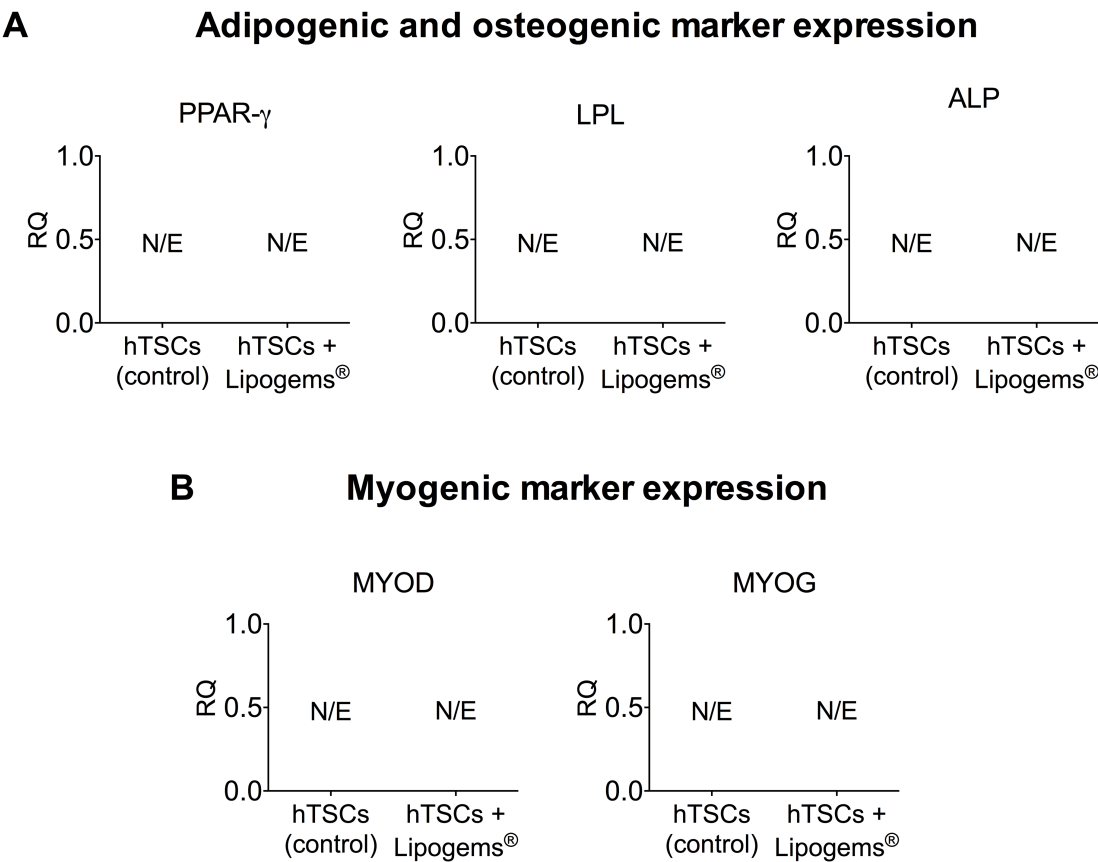

Supplement: f1 [file 4373410.f1.pdf]
